# Supplementary material
Source: publisher site journal article supplement (http://content.karger.com/ProdukteDB/miscArchiv/000/135/688/TBI917_Suppl.pdf)
Supplement: Supplementary file 1 [file TBI917_Suppl.pdf]

PC1

Individual HSPDP paralog frequencies of PC cohort 1

| no. | ID | age | allele_freq | copies | CN round |
|-----|----|-----|-------------|--------|----------|
| 1   | 2  | 66  | 65.0        | 5.4    | 5        |
| 2   | 3  | 51  | 65.5        | 5.3    | 5        |
| 3   | 5  | 67  | 61.3        | 6.3    | 6        |
| 4   | 6  | 66  | 70.1        | 4.3    | 4        |
| 5   | 8  | 52  | 61.6        | 6.2    | 6        |
| 6   | 9  | 66  | 63.3        | 5.8    | 6        |
| 7   | 10 | 66  | 62.2        | 6.1    | 6        |
| 8   | 11 | 67  | 62.5        | 6.0    | 6        |
| 9   | 12 | 70  | 58.1        | 7.2    | 7        |
| 10  | 13 | 59  | 63.0        | 5.9    | 6        |
| 11  | 14 | 59  | 62.4        | 6.0    | 6        |
| 12  | 16 | 64  | 63.1        | 5.8    | 6        |
| 13  | 18 | 66  | 63.2        | 5.8    | 6        |
| 14  | 19 | 63  | 60.1        | 6.6    | 7        |
| 15  | 20 | 62  | 63.4        | 5.8    | 6        |
| 16  | 23 | 56  | 63.7        | 5.7    | 6        |
| 17  | 24 | 59  | 64.8        | 5.4    | 5        |
| 18  | 25 | 62  | 65.2        | 5.3    | 5        |
| 19  | 27 | 57  | 63.8        | 5.7    | 6        |
| 20  | 28 | 55  | 66.8        | 5.0    | 5        |
| 21  | 29 | 59  | 65.4        | 5.3    | 5        |
| 22  | 30 | 63  | 62.6        | 6.0    | 6        |
| 23  | 32 | 61  | 66.3        | 5.1    | 5        |
| 24  | 33 | 66  | 64.2        | 5.6    | 6        |
| 25  | 34 | 61  | 64.4        | 5.5    | 6        |
| 26  | 35 | 60  | 66.3        | 5.1    | 5        |
| 27  | 38 | 70  | 64.7        | 5.5    | 5        |
| 28  | 39 | 62  | 62.7        | 5.9    | 6        |
| 29  | 40 | 50  | 64.9        | 5.4    | 5        |
| 30  | 41 | 66  | 70.1        | 4.3    | 4        |
| 31  | 42 | 64  | 65.3        | 5.3    | 5        |
| 32  | 43 | 61  | 63.0        | 5.9    | 6        |
| 33  | 45 | 58  | 66.1        | 5.1    | 5        |
| 34  | 46 | 54  | 65.5        | 5.3    | 5        |
| 35  | 47 | 65  | 65.5        | 5.3    | 5        |
| 36  | 48 | 67  | 64.9        | 5.4    | 5        |
| 37  | 49 | 61  | 65.6        | 5.2    | 5        |
| 38  | 51 | 60  | 69.2        | 4.5    | 4        |
| 39  | 52 | 56  | 65.9        | 5.2    | 5        |
| 40  | 53 | 64  | 65.6        | 5.2    | 5        |
| 41  | 54 | 66  | 62.5        | 6.0    | 6        |
| 42  | 55 | 57  | 66.0        | 5.2    | 5        |
| 43  | 56 | 55  | 66.2        | 5.1    | 5        |
| 44  | 58 | 69  | 65.4        | 5.3    | 5        |
| 45  | 59 | 60  | 66.8        | 5.0    | 5        |
| 46  | 60 | 59  | 67.0        | 4.9    | 5        |
| 47  | 62 | 59  | 67.3        | 4.9    | 5        |
| 48  | 64 | 63  | 69.3        | 4.4    | 4        |
| 49  | 65 | 64  | 65.7        | 5.2    | 5        |

|         | %G         | CN         |
|---------|------------|------------|
| average | 66.0557895 | 5.16659431 |
| median  | 65.9       | 5.17450683 |
| max     | 73         | 7.21170396 |
| min     | 58.1       | 3.69863014 |

| CN    | #  |
|-------|----|
| 4     | 16 |
| 5     | 53 |
| 6     | 22 |
| 7     | 4  |
| 8     | 0  |
| <hr/> |    |
|       | 95 |

PC1

|    |     |    |      |     |   |
|----|-----|----|------|-----|---|
| 50 | 67  | 69 | 67.3 | 4.9 | 5 |
| 51 | 68  | 63 | 65.3 | 5.3 | 5 |
| 52 | 71  | 65 | 67.9 | 4.7 | 5 |
| 53 | 72  | 61 | 63.8 | 5.7 | 6 |
| 54 | 73  | 69 | 64.5 | 5.5 | 6 |
| 55 | 74  | 73 | 66.0 | 5.2 | 5 |
| 56 | 75  | 60 | 68.8 | 4.5 | 5 |
| 57 | 76  | 64 | 65.9 | 5.2 | 5 |
| 58 | 77  | 70 | 68.9 | 4.5 | 5 |
| 59 | 79  | 66 | 68.9 | 4.5 | 5 |
| 60 | 80  | 61 | 69.1 | 4.5 | 4 |
| 61 | 83  | 63 | 65.1 | 5.4 | 5 |
| 62 | 85  | 60 | 68.1 | 4.7 | 5 |
| 63 | 86  | 53 | 69.3 | 4.4 | 4 |
| 64 | 87  | 55 | 65.9 | 5.2 | 5 |
| 65 | 88  | 66 | 69.4 | 4.4 | 4 |
| 66 | 89  | 69 | 60.3 | 6.6 | 7 |
| 67 | 90  | 62 | 70.3 | 4.2 | 4 |
| 68 | 91  | 77 | 66.7 | 5.0 | 5 |
| 69 | 92  | 63 | 71.0 | 4.1 | 4 |
| 70 | 93  | 56 | 67.8 | 4.7 | 5 |
| 71 | 95  | 68 | 69.3 | 4.4 | 4 |
| 72 | 96  | 62 | 69.0 | 4.5 | 4 |
| 73 | 97  | 67 | 65.7 | 5.2 | 5 |
| 74 | 98  | 63 | 68.1 | 4.7 | 5 |
| 75 | 100 | 61 | 68.2 | 4.7 | 5 |
| 76 | 102 | 58 | 67.9 | 4.7 | 5 |
| 77 | 103 | 58 | 65.7 | 5.2 | 5 |
| 78 | 104 | 63 | 66.1 | 5.1 | 5 |
| 79 | 105 | 60 | 67.2 | 4.9 | 5 |
| 80 | 106 | 63 | 64.3 | 5.6 | 6 |
| 81 | 108 | 70 | 60.1 | 6.6 | 7 |
| 82 | 110 | 63 | 67.6 | 4.8 | 5 |
| 83 | 111 | 59 | 68.0 | 4.7 | 5 |
| 84 | 113 | 50 | 68.9 | 4.5 | 5 |
| 85 | 114 | 55 | 70.0 | 4.3 | 4 |
| 86 | 115 | 68 | 66.6 | 5.0 | 5 |
| 87 | 117 | 71 | 70.5 | 4.2 | 4 |
| 88 | 119 | 60 | 69.2 | 4.5 | 4 |
| 89 | 121 | 64 | 73.0 | 3.7 | 4 |
| 90 | 123 | 70 | 61.7 | 6.2 | 6 |
| 91 | 124 | 59 | 68.9 | 4.5 | 5 |
| 92 | 126 | 66 | 68.8 | 4.5 | 5 |
| 93 | 128 | 63 | 71.4 | 4.0 | 4 |
| 94 | 129 | 62 | 67.5 | 4.8 | 5 |
| 95 | 135 | 64 | 67.8 | 4.7 | 5 |

PC2

**Individual HSPDP paralog frequencies of PC cohort 2**

| no. | ID  | age | allele_freq | copies | CN | round |
|-----|-----|-----|-------------|--------|----|-------|
| 1   | 71  | 57  | 65.4        | 5.3    | 5  |       |
| 2   | 82  | 57  | 63.6        | 5.7    | 6  |       |
| 3   | 84  | 68  | 59.9        | 6.7    | 7  |       |
| 4   | 89  | 67  | 66.3        | 5.1    | 5  |       |
| 5   | 95  | 67  | 70.5        | 4.2    | 4  |       |
| 6   | 120 | 68  | 69.7        | 4.3    | 4  |       |
| 7   | 98  | 59  | 63.6        | 5.7    | 6  |       |
| 8   | 99  | 56  | 64.3        | 5.6    | 6  |       |
| 9   | 100 | 69  | 70.4        | 4.2    | 4  |       |
| 10  | 111 | 65  | 59.5        | 6.8    | 7  |       |
| 11  | 113 | 69  | 60.7        | 6.5    | 6  |       |
| 12  | 114 | 64  | 66.1        | 5.1    | 5  |       |
| 13  | 115 | 59  | 63.9        | 5.7    | 6  |       |
| 14  | 117 | 68  | 66.8        | 5.0    | 5  |       |
| 15  | 118 | 66  | 66.9        | 5.0    | 5  |       |
| 16  | 119 | 58  | 62.7        | 6.0    | 6  |       |
| 17  | 97  | 63  | 62.2        | 6.1    | 6  |       |
| 18  | 121 | 66  | 69.1        | 4.5    | 4  |       |
| 19  | 123 | 55  | 65.8        | 5.2    | 5  |       |
| 20  | 124 | 65  | 66.3        | 5.1    | 5  |       |
| 21  | 125 | 69  | 71.7        | 4.0    | 4  |       |
| 22  | 127 | 64  | 60.3        | 6.6    | 7  |       |
| 23  | 128 | 68  | 66.3        | 5.1    | 5  |       |
| 24  | 132 | 63  | 70.2        | 4.3    | 4  |       |
| 25  | 133 | 69  | 71.0        | 4.1    | 4  |       |
| 26  | 134 | 68  | 63.4        | 5.8    | 6  |       |
| 27  | 141 | 62  | 63.4        | 5.8    | 6  |       |
| 28  | 142 | 63  | 64.3        | 5.6    | 6  |       |
| 29  | 145 | 68  | 64.5        | 5.5    | 6  |       |
| 30  | 146 | 65  | 54.5        | 8.4    | 8  |       |
| 31  | 147 | 66  | 64.4        | 5.5    | 6  |       |
| 32  | 149 | 64  | 57.0        | 7.5    | 8  |       |
| 33  | 150 | 63  | 64.5        | 5.5    | 6  |       |
| 34  | 151 | 59  | 61.2        | 6.4    | 6  |       |
| 35  | 155 | 59  | 70.5        | 4.2    | 4  |       |
| 36  | 156 | 53  | 64.6        | 5.5    | 5  |       |
| 37  | 159 | 56  | 64.2        | 5.6    | 6  |       |
| 38  | 160 | 57  | 64.8        | 5.4    | 5  |       |
| 39  | 162 | 64  | 58.1        | 7.2    | 7  |       |
| 40  | 169 | 67  | 63.9        | 5.6    | 6  |       |
| 41  | 170 | 65  | 57.2        | 7.5    | 7  |       |
| 42  | 171 | 59  | 68.9        | 4.5    | 5  |       |
| 43  | 173 | 65  | 59.6        | 6.8    | 7  |       |
| 44  | 175 | 60  | 68.9        | 4.5    | 5  |       |
| 45  | 176 | 67  | 59.9        | 6.7    | 7  |       |
| 46  | 179 | 66  | 58.4        | 7.1    | 7  |       |
| 47  | 180 | 55  | 64.8        | 5.4    | 5  |       |
| 48  | 181 | 46  | 64.8        | 5.4    | 5  |       |
| 49  | 184 | 63  | 70.3        | 4.2    | 4  |       |
| 50  | 185 | 59  | 65.4        | 5.3    | 5  |       |
| 51  | 186 | 69  | 69.4        | 4.4    | 4  |       |
| 52  | 188 | 64  | 64.0        | 5.6    | 6  |       |

|         | %G    | CN   |
|---------|-------|------|
| average | 63.71 | 5.76 |
| median  | 64.08 | 5.61 |
| max     | 71.65 | 8.37 |
| min     | 54.45 | 3.96 |

| CN | #         |
|----|-----------|
| 4  | 16        |
| 5  | 22        |
| 6  | 32        |
| 7  | 20        |
| 8  | 4         |
|    | <u>94</u> |

PC2

|    |     |    |      |     |   |
|----|-----|----|------|-----|---|
| 53 | 189 | 69 | 59.5 | 6.8 | 7 |
| 54 | 190 | 68 | 57.2 | 7.5 | 7 |
| 55 | 191 | 67 | 65.0 | 5.4 | 5 |
| 56 | 193 | 66 | 59.5 | 6.8 | 7 |
| 57 | 197 | 56 | -    | -   | - |
| 58 | 200 | 58 | 61.9 | 6.2 | 6 |
| 59 | 201 | 63 | 66.6 | 5.0 | 5 |
| 60 | 202 | 65 | 61.7 | 6.2 | 6 |
| 61 | 203 | 60 | 63.5 | 5.8 | 6 |
| 62 | 204 | 65 | 56.0 | 7.9 | 8 |
| 63 | 205 | 50 | 56.7 | 7.6 | 8 |
| 64 | 206 | 64 | 64.4 | 5.5 | 6 |
| 65 | 207 | 59 | 63.8 | 5.7 | 6 |
| 66 | 209 | 67 | 57.4 | 7.4 | 7 |
| 67 | 211 | 58 | 63.8 | 5.7 | 6 |
| 68 | 212 | 66 | 70.2 | 4.2 | 4 |
| 69 | 213 | 61 | 60.7 | 6.5 | 6 |
| 70 | 215 | 52 | 60.0 | 6.7 | 7 |
| 71 | 217 | 65 | 69.5 | 4.4 | 4 |
| 72 | 22  | 76 | 61.1 | 6.4 | 6 |
| 73 | 223 | 63 | 59.2 | 6.9 | 7 |
| 74 | 224 | 68 | 63.5 | 5.8 | 6 |
| 75 | 225 | 63 | 69.8 | 4.3 | 4 |
| 76 | 226 | 62 | 61.3 | 6.3 | 6 |
| 77 | 227 | 60 | 70.0 | 4.3 | 4 |
| 78 | 230 | 62 | 58.2 | 7.2 | 7 |
| 79 | 231 | 60 | 64.7 | 5.5 | 5 |
| 80 | 233 | 68 | 61.5 | 6.3 | 6 |
| 81 | 234 | 67 | 58.1 | 7.2 | 7 |
| 82 | 276 | 52 | 58.2 | 7.2 | 7 |
| 83 | 278 | 64 | 69.6 | 4.4 | 4 |
| 84 | 279 | 65 | 61.6 | 6.2 | 6 |
| 85 | 280 | 64 | 65.6 | 5.3 | 5 |
| 86 | 282 | 65 | 60.4 | 6.6 | 7 |
| 87 | 284 | 69 | 65.4 | 5.3 | 5 |
| 88 | 286 | 67 | 64.2 | 5.6 | 6 |
| 89 | 287 | 60 | 58.2 | 7.2 | 7 |
| 90 | 297 | 66 | 61.4 | 6.3 | 6 |
| 91 | 298 | 60 | 64.7 | 5.5 | 5 |
| 92 | 300 | 68 | 64.9 | 5.4 | 5 |
| 93 | 307 | 58 | 64.3 | 5.6 | 6 |
| 94 | 308 | 69 | 69.5 | 4.4 | 4 |
| 95 | 310 | 64 | 60.6 | 6.5 | 7 |

CTRL

Individual HSPDP paralog frequencies of control

| no. | ID | age | allele_freq | copies | CN | round |
|-----|----|-----|-------------|--------|----|-------|
| 1   | 2  | 45  | 53.7        | 8.6    | 9  |       |
| 2   | 3  | 52  | 74.8        | 3.4    | 3  |       |
| 3   | 5  | 37  | 61.1        | 6.4    | 6  |       |
| 4   | 6  | 66  | 59.8        | 6.7    | 7  |       |
| 5   | 7  | 34  | 49.8        | 10.1   | 10 |       |
| 6   | 13 | 31  | 74.8        | 3.4    | 3  |       |
| 7   | 16 | 60  | 59.2        | 6.9    | 7  |       |
| 8   | 17 | 34  | 66.1        | 5.1    | 5  |       |
| 9   | 19 | 36  | 55.5        | 8.0    | 8  |       |
| 10  | 20 | 40  | 64.2        | 5.6    | 6  |       |
| 11  | 21 | 67  | 57.9        | 7.3    | 7  |       |
| 12  | 23 | 50  | 64.2        | 5.6    | 6  |       |
| 13  | 24 | 69  | 63.7        | 5.7    | 6  |       |
| 14  | 25 | 32  | 63.6        | 5.7    | 6  |       |
| 15  | 26 | 50  | 60.1        | 6.6    | 7  |       |
| 16  | 27 | 47  | 65.9        | 5.2    | 5  |       |
| 17  | 28 | 53  | 63.7        | 5.7    | 6  |       |
| 18  | 29 | 54  | 66.2        | 5.1    | 5  |       |
| 19  | 30 | 71  | 45.0        | 12.2   | 12 |       |
| 20  | 31 | 41  | 61.3        | 6.3    | 6  |       |
| 21  | 32 | 32  | 63.6        | 5.7    | 6  |       |
| 22  | 33 | 57  | 61.9        | 6.2    | 6  |       |
| 23  | 35 | 44  | 55.1        | 8.1    | 8  |       |
| 24  | 36 | 59  | 62.2        | 6.1    | 6  |       |
| 25  | 37 | 50  | 68.2        | 4.7    | 5  |       |
| 26  | 38 | 45  | 62.4        | 6.0    | 6  |       |
| 27  | 40 | 50  | 62.4        | 6.0    | 6  |       |
| 28  | 44 | 52  | 62.5        | 6.0    | 6  |       |
| 29  | 48 | 56  | 71.0        | 4.1    | 4  |       |
| 30  | 50 | 39  | 63.4        | 5.8    | 6  |       |
| 31  | 51 | 48  | 62.7        | 5.9    | 6  |       |
| 32  | 53 | 46  | 63.6        | 5.7    | 6  |       |
| 33  | 54 | 61  | 66.1        | 5.1    | 5  |       |
| 34  | 55 | 47  | 63.7        | 5.7    | 6  |       |
| 35  | 56 | 50  | 62.1        | 6.1    | 6  |       |
| 36  | 57 | 55  | 69.7        | 4.3    | 4  |       |
| 37  | 58 | 60  | 64.0        | 5.6    | 6  |       |
| 38  | 60 | 34  | 69.1        | 4.5    | 4  |       |
| 39  | 61 | 46  | 65.0        | 5.4    | 5  |       |
| 40  | 64 | 56  | 65.2        | 5.3    | 5  |       |
| 41  | 66 | 43  | 65.8        | 5.2    | 5  |       |
| 42  | 67 | 36  | 60.1        | 6.6    | 7  |       |
| 43  | 68 | 52  | 65.9        | 5.2    | 5  |       |
| 44  | 69 | 56  | 66.1        | 5.1    | 5  |       |
| 45  | 70 | 55  | 62.6        | 6.0    | 6  |       |
| 46  | 72 | 47  | 66.2        | 5.1    | 5  |       |
| 47  | 74 | 55  | 68.3        | 4.6    | 5  |       |
| 48  | 75 | 40  | 66.8        | 5.0    | 5  |       |
| 49  | 76 | 52  | 66.9        | 4.9    | 5  |       |

|         | %G    | CN    |
|---------|-------|-------|
| average | 63.39 | 5.956 |
| median  | 63.7  | 5.699 |
| max     | 74.8  | 12.27 |
| min     | 44.9  | 3.369 |

| CN | #  |
|----|----|
| 3  | 6  |
| 4  | 8  |
| 5  | 26 |
| 6  | 33 |
| 7  | 9  |
| 8  | 3  |
| 9  | 2  |
| 10 | 4  |
| 11 | 2  |
| 12 | 2  |
|    | 95 |

CTRL

|    |     |    |      |      |    |
|----|-----|----|------|------|----|
| 50 | 77  | 51 | 67.1 | 4.9  | 5  |
| 51 | 78  | 49 | 65.7 | 5.2  | 5  |
| 52 | 81  | 43 | 74.8 | 3.4  | 3  |
| 53 | 83  | 45 | 67.4 | 4.8  | 5  |
| 54 | 84  | 60 | 67.7 | 4.8  | 5  |
| 55 | 87  | 55 | 69.8 | 4.3  | 4  |
| 56 | 89  | 44 | 70.3 | 4.2  | 4  |
| 57 | 90  | 38 | 73.2 | 3.7  | 4  |
| 58 | 91  | 56 | 66.1 | 5.1  | 5  |
| 59 | 92  | 50 | 74.6 | 3.4  | 3  |
| 60 | 93  | 61 | 50.7 | 9.7  | 10 |
| 61 | 94  | 53 | 50.3 | 9.9  | 10 |
| 62 | 97  | 48 | 74.6 | 3.4  | 3  |
| 63 | 101 | 33 | 63.6 | 5.7  | 6  |
| 64 | 102 | 52 | 64.6 | 5.5  | 5  |
| 65 | 103 | 40 | 62.3 | 6.1  | 6  |
| 66 | 104 | 51 | 63.3 | 5.8  | 6  |
| 67 | 105 | 58 | 48.5 | 10.6 | 11 |
| 68 | 106 | 57 | 60.4 | 6.6  | 7  |
| 69 | 107 | 50 | 61.4 | 6.3  | 6  |
| 70 | 109 | 63 | 60.6 | 6.5  | 7  |
| 71 | 110 | 53 | 70.2 | 4.2  | 4  |
| 72 | 111 | 42 | 67.3 | 4.9  | 5  |
| 73 | 112 | 49 | 62.5 | 6.0  | 6  |
| 74 | 114 | 52 | 61.6 | 6.2  | 6  |
| 75 | 116 | 49 | 63.2 | 5.8  | 6  |
| 76 | 117 | 56 | 44.9 | 12.3 | 12 |
| 77 | 118 | 41 | 74.6 | 3.4  | 3  |
| 78 | 119 | 51 | 63.6 | 5.7  | 6  |
| 79 | 120 | 45 | 63.7 | 5.7  | 6  |
| 80 | 121 | 53 | 59.4 | 6.8  | 7  |
| 81 | 122 | 35 | 48.6 | 10.6 | 11 |
| 82 | 123 | 49 | 63.7 | 5.7  | 6  |
| 83 | 124 | 57 | 62.5 | 6.0  | 6  |
| 84 | 125 | 50 | 73.8 | 3.6  | 4  |
| 85 | 126 | 48 | 58.4 | 7.1  | 7  |
| 86 | 128 | 33 | 66.8 | 5.0  | 5  |
| 87 | 130 | 44 | 67.8 | 4.7  | 5  |
| 88 | 133 | 49 | 50.6 | 9.8  | 10 |
| 89 | 134 | 51 | 63.7 | 5.7  | 6  |
| 90 | 139 | 43 | 52.5 | 9.0  | 9  |
| 91 | 142 | 46 | 67.2 | 4.9  | 5  |
| 92 | 143 | 52 | 68.2 | 4.7  | 5  |
| 93 | 144 | 39 | 67.2 | 4.9  | 5  |
| 94 | 149 | 47 | 64.2 | 5.6  | 6  |
| 95 | 150 | 51 | 56.0 | 7.9  | 8  |
